# Supplementary material
Source: Springer Nature journal article supplement (https://www.springermedizin.de/resource/supplementary/12872_2009_244_MOESM7_ESM.pdf/9431324)
Supplement: MOESM7 [file 9431324]

**RURAL-URBAN  
MIGRANT GROUP**

Census Update 2006,  
N = 1785 >30year-old

Randomly selected  
n = 984

Moved away / no longer resident 60  
Dead 2  
Other 6  
[Alcoholic 3, Pregnant 2, Schizophrenic 1]

Attempted to contact  
n = 916

*Not contacted*  
Travelling 23  
Unavailable after 3 home visits 21

Contacted  
n = 872

*Did not want to participate* 160

Enrolled  
n = 712

*Did not complete study*  
Withdrew from study 88  
Unavailable after 3 home visits 19  
Travelling 5  
Moved away / no longer resident 4  
Deaths 1  
Other 6  
[Pregnant 4, Did not attend clinic 1, Incomplete  
questionnaires 1]

Completed study  
n = 589
